# Supplementary material for: Construction of PtSe2/Ge heterostructure-based short-wavelength infrared photodetector array for image sensing and optical communication applications
Source: Royal Society of Chemistry journal article supplement (doi:10.1039/d1nr00333j), 2021-01-01
Supplement: d1nr00333j1.pdf [file d1nr00333j1.pdf]

Supporting Information for

## Construction of PtSe<sub>2</sub>/Ge heterostructure-based short-wavelength infrared photodetectors array for image sensing and optical communication applications

Yu Lu,<sup>1</sup> Yue Wang,<sup>1</sup> Chenhao Xu,<sup>1</sup> Chao Xie,<sup>1,2\*</sup> Wenbin Li,<sup>1</sup> Jie Ding,<sup>1</sup> Wanying Zhou,<sup>1</sup> Zipeng Qin,<sup>1</sup> Xinyi Shen<sup>1</sup> and Linbao Luo<sup>1\*</sup>

<sup>1</sup> School of Electronic Science and Applied Physics, Hefei University of Technology, Hefei, Anhui 230009, P. R. China

<sup>2</sup> School of Electronics and Information Engineering, Anhui University, Hefei, Anhui 230601, P. R. China

\* Email: chaoxie@ahu.edu.cn, luolb@hfut.edu.cn

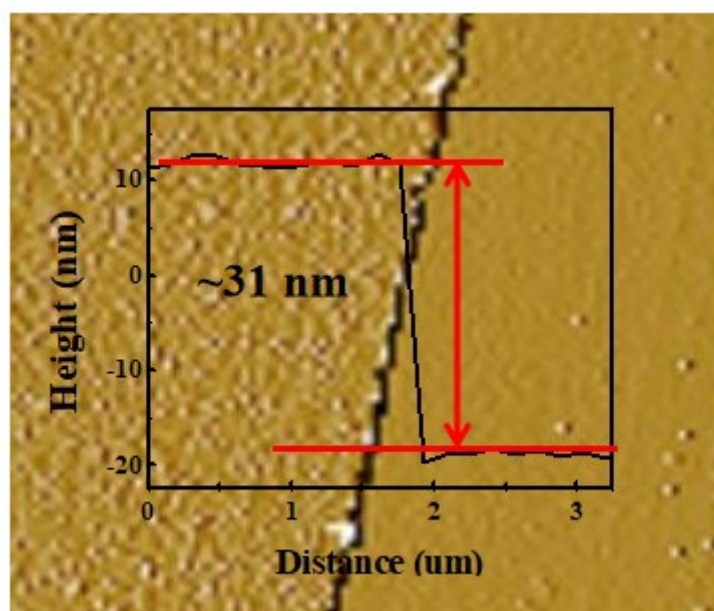

**Fig. S1.** The AFM image of the multilayered PtSe<sub>2</sub> film atop a Ge substrate. The inset in it shows the height profile of the film.

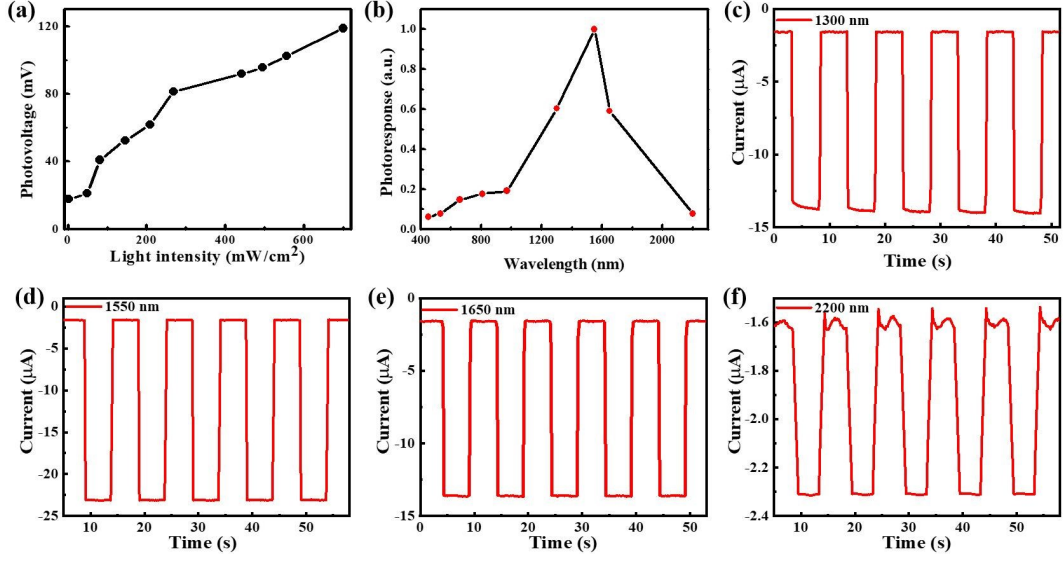

**Fig. S2.** (a) The photovoltage of the device as a function of incident light intensity. (b) The normalized photoresponse as a function of incident light wavelength. The time-dependent photoresponse of the device under SWIR illumination with wavelengths of (c) 1300 nm, (d) 1550 nm, (e) 1650 nm and (f) 2200 nm.

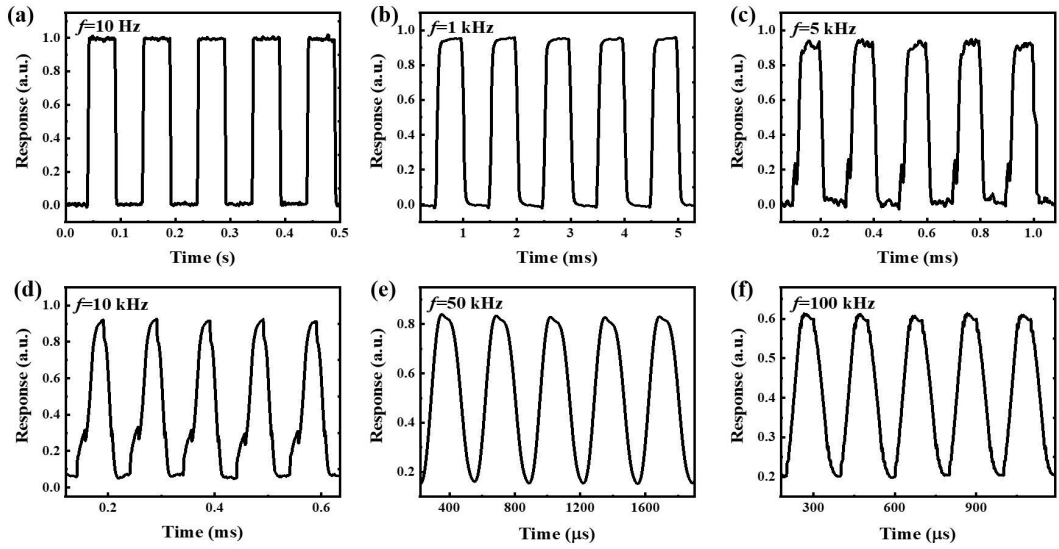

**Fig. S3.** The photoresponse of the device under 1550 nm illumination with different modulating frequencies at (a) 10 Hz, (b) 1 kHz, (c) 5 kHz, (d) 10 kHz, (e) 50 kHz and (f) 100 kHz.

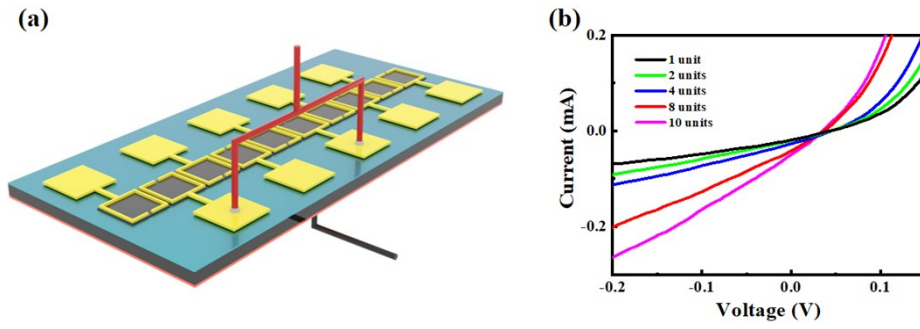

**Fig. S4.** (a) Schematic diagram of the photodetectors array connected in parallel. (b)  $I$ - $V$  curves of the photodetectors array connected in parallel with different unit numbers under 1550 nm light irradiation.

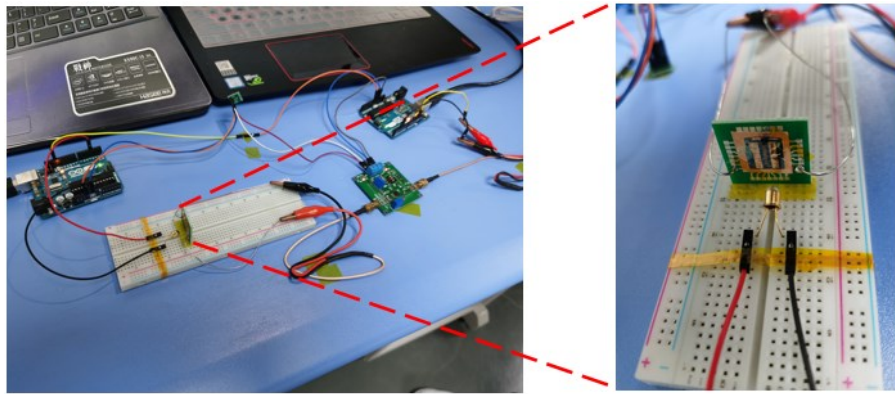

**Fig. S5.** The digital photograph of the SWIR optical communication system.
